# Supplementary material for: Light Regulation of LoCOP1 and Its Role in Floral Scent Biosynthesis in Lilium ‘Siberia’
Source: MDPI journal article supplement (doi:10.3390/plants12102004), 2023-05-16
Supplement: s1 [file s1]

**Table S1.** *LoCOPI* ORF nucleotide sequence

| <i>LoCOPI</i> ORF nucleotide sequence                                                                                                                                                                                                                                                                                                                                                                                                                                                                                                                                                                                                                                                                                                                                                                                                                                                                                                                                                                                                                                                                                                                                                                                                                                                                                                                                                                                                                                                                                                                                                                                                                                                                                                                                                                                                                                                                                                                                                                                                                                                                                                                                                                                                                                                                      |
|------------------------------------------------------------------------------------------------------------------------------------------------------------------------------------------------------------------------------------------------------------------------------------------------------------------------------------------------------------------------------------------------------------------------------------------------------------------------------------------------------------------------------------------------------------------------------------------------------------------------------------------------------------------------------------------------------------------------------------------------------------------------------------------------------------------------------------------------------------------------------------------------------------------------------------------------------------------------------------------------------------------------------------------------------------------------------------------------------------------------------------------------------------------------------------------------------------------------------------------------------------------------------------------------------------------------------------------------------------------------------------------------------------------------------------------------------------------------------------------------------------------------------------------------------------------------------------------------------------------------------------------------------------------------------------------------------------------------------------------------------------------------------------------------------------------------------------------------------------------------------------------------------------------------------------------------------------------------------------------------------------------------------------------------------------------------------------------------------------------------------------------------------------------------------------------------------------------------------------------------------------------------------------------------------------|
| ATGGCGGACGCCTCCGTCGGCGCTCTCGTCCCGTCTGTGGGAAAGCCCGAGGCCCG<br>CTCCTCGATGCCGGCGGTTTCCTCGTCGGAGACGACCGACACTGCCGCCGTGATGG<br>CGGTAGATAGAGTGAGACCCAGAGCATCGGCGGGCGCCGGCGGAAGAAGAAGAGGA<br>GCAGGACAAGGATTTGCTGTGTCCGATCTGTATGGGGACGATTAAGGACGCGTTTCT<br>GACGGCGTGCGGGCACAGCTTCTGCTACATGTGTATTGTACGCATCTTCAGAATAA<br>GAGCGATTGTCCGTGCTGTGCTCATTATCTCACGAAGAATAACATATTCCTCAATTC<br>TTGCTCAATAAGCTTTTGAAGAAAATGTCTGCCCATCAAATTGCTAAACTGCATCA<br>CCGTTGAGCATCTCCGTCTGGCATTGCAACAGGGTTGTGAAATGTCGATTAAGGAG<br>ATGGACAGTTTGCTATCTCTGCTTACAGAGAAAAAGAGGAAGATAGAGCAACAAGA<br>GGCTGAGACTAACATGCAGATTTTGCTTGATTTCCTGCACTGTCTTCGGAAGCAAAA<br>GCTAGAGGAGCTAAATGAGGTTCAAAATGATCTGCAATATATCAAAGAAGATGTGAT<br>TGCTGCAGAGAAACACAGGATAGAGTTATATCGAGCAAGGGAGAGATACTCTTTAA<br>AATTGAGGATGCTTTTGGATGATTCTTTGGCAACAAAGTTATGGCCTTCCACACTTGA<br>GAAGCACAATAATATCCTTGTCCCAATGTTTCGTAGCTCATATGGCGGGACATCTTCC<br>GGAAATTTCCAGACTCAAAAAGTTGATAACAAAGCTCAAGGAAGCTATCCAGGGCA<br>GCAGAGGAAAGATGCATTTAGTGTTTCAGATTCACAACAATCTCTTATGCAATCAGG<br>GCTGGCTGTAGCTAGAAAGAGACGAGTACATCAACAGTTTAATGAGCTACAAGAGT<br>GCTACTTACAAAAACGGCGCCTAGGAGCCAACCAACAATGCAGGCAAGAAGGAGA<br>TACACGTTCTACAAACAGAGAAGGCTATCATGCAGGTCTTGAGGATTTTCAGTCCGT<br>ACTGACTACCTTTACTCGATACAGTCGATTGCGTGTATTGCGGAACCTTAGACACGG<br>GGATCTCTTTCACACTGCAAATATTGTATCCAGCATAGAATTCGACCGTGATGACGAG<br>TTATTTGCTACTGCTGGAGTTTCCAAACGGATAAAAGTTTTTGAGTTCTCCACAGTAA<br>GCTCGGTTGTAAATGAGCCTGCCGAGGTACACTGCCCTGTTGTAGAGATGTCTACCC<br>GATCTAACTTAGTTGCTTAAGTTGGAACAAGTACTCGAAAAACATCATTGCAAGTA<br>GTGATTATGAAGGCATAGTGACTGTTTGGGATGTAAATACTCGCCAGAGTGTGATGG<br>AATACGAAGAGCATGAAAAGAGAGCATGGAGTGTTGATTTTTTCACGCACAGAACCA<br>ACCATGCTGGTATCAGGTAGCGATGATTGTAAGGTCAAAGTTTGGTGCACAAAGCAA<br>GAAGCTAGCGTGTTCAATATCGATATGAAAGCAAATATATGTTGTGTCAAATATAATCC<br>TGGATCCAGCTTTCATGTGGCGGTTGGTTCTGCTGATCACCACATTCATATTTTGAT<br>TTGAGAAATACCAGTGCTCCACTCCATGTCTTCAGAGGTCACAGGAAAACAGTTTC<br>GTACGTCAAATTTCTATCAACTAATGAACTTGCATCTGCATCCACGGACAGTACATTG<br>CGCTTGTGGGATGTAAAAGACAACCTGTGCTGTTTCGAACATTCAAAGGCCACGCGAA<br>TGAGAAGAATTTTCGTAGGTCTGACAGTGAATGACGAGTATCTCGCATGTGGCAGCGA<br>AACAAATGAAGTCTTTGTGTACCATAAGGCCATCTCGAAGCCGTCAACGTGGCATCG<br>ATTGAGTTTCTCCGAACCGGACGTTACTGATGATGATGCTGGATCATACTTCATAAGT<br>GCTGTATGCTGGAAGAGTGACAGCCCCACGATGTAACTGCAAACAGTCAGGGAAC<br>AATCAAGGTCCTTGTGCTTGCTGCCTGA |

**Table S2.** LoSAP ORF nucleotide sequence

| <i>LoSAP</i> ORF nucleotide sequence                                                                                                                                                                                                                                                                                                                                                                                                                                                                                                                                                                                                                                                                                                                                                                                                                                                                                                                                                                                                                                                                                                                                                                                                                                                                                                                                                                                                                                                                                                                                                                                                                                                                                                                                                                                                                                                                                                                                                                                                                                                                                                                                                                                                                                                                                                                                                                                                                                                                                                                                                                                                                                                                                                                                                                                                                                                                                                    |
|-----------------------------------------------------------------------------------------------------------------------------------------------------------------------------------------------------------------------------------------------------------------------------------------------------------------------------------------------------------------------------------------------------------------------------------------------------------------------------------------------------------------------------------------------------------------------------------------------------------------------------------------------------------------------------------------------------------------------------------------------------------------------------------------------------------------------------------------------------------------------------------------------------------------------------------------------------------------------------------------------------------------------------------------------------------------------------------------------------------------------------------------------------------------------------------------------------------------------------------------------------------------------------------------------------------------------------------------------------------------------------------------------------------------------------------------------------------------------------------------------------------------------------------------------------------------------------------------------------------------------------------------------------------------------------------------------------------------------------------------------------------------------------------------------------------------------------------------------------------------------------------------------------------------------------------------------------------------------------------------------------------------------------------------------------------------------------------------------------------------------------------------------------------------------------------------------------------------------------------------------------------------------------------------------------------------------------------------------------------------------------------------------------------------------------------------------------------------------------------------------------------------------------------------------------------------------------------------------------------------------------------------------------------------------------------------------------------------------------------------------------------------------------------------------------------------------------------------------------------------------------------------------------------------------------------------|
| ATGATACCTAACTCGTCCGCAGGCGCCAGCTCCACCGTGCAGTGGAGCCGAGAGGTCTCTGGCCT<br>AATCTCACCAGGCTAGGCGGCGCGCTGCCAAATTCGTTAGGTAACAGACCTCCACTAACTATGGAA<br>ACTAGAGATGATGCATGGGGTTTATTTCTTCCGCAGATTGGGGCTCGCCGGCCGCCTCTCCCAATCC<br>GGACGAGTACTCCGCCTCCGTCTGGGTTCACACAATTCGCAATCAAGAAGGGGAAGGAGGTTCAT<br>CTGCCTCCCGGATTAGAGTAGTAGGACGGAGAAGAACCAGAGTACGGAGATTGCTTCTAATTTGC<br>CTCATCGGCAAGGTGGGAAACCAAGTGTGGCGGTCTGGGGAGGGAATGCGAGTGTTCCTGACCT<br>CATCATGAGGGTACCAGCATGAGGGAGTGGCTGAAACAGAGGCAGCACAAAGTTCAATAAGGACGA<br>GAGGCTCACCTTTTTCCGGCAGATATTGGAGCTGGTTGAAATTACACATTCACAGGGGCTGTGCGTG<br>CATAGTTTGAGACCGTCTTATTTTCATGATATTCCCGATGAATCAGATCAAGTATATTGGTTCCTTGGTT<br>CCGGAAGGGCAGCCGAGGCCGCTGACGCGACCGGCAGACGAAGATGGTCGCTCTTCGGAGAGCA<br>GTGGTTCAAAGAGGAAGATGAATTTGCAACCAGAGGCAGTGGGTAATTTATCACTGAAGCGCCGA<br>AAAGTCTGGCAACCTGATTATGGGACTTTGACGGCACAAATTTCTGACAATGGCCATCGGAGACAA<br>CATCTTGAAGTGGGTCCCGATCACAATTTCCAGATTCCAGCTATACAGTTGTTGAAATCTGATATTAG<br>GAAAATGGAGGAGAGATGGTATGCCAGTCCTGAGGAGCAAAATGACAACATATGCTATCTTTCTTC<br>AAATATCTATAATCTCGGTGTTCTTGTTCGAGCTCTTTTGTCAATTCGACACTTTGGAAGCACATTA<br>TGCTGCAATGTCCGATCTGCGGCATCGGATTCTCCCGCCAAATTTCTTATCAGAAAATCCCAAGGAG<br>GCTAGTTTATGTCTTTGGTTGCTCCATCCAGACCTTCTTCTCGACCCAAGTCAAGGGACATTTTAAAC<br>ATGTGGCCTAGTATGTGAAGGGAGAAACCGGTTGTCGCTAAATCAGTCATCAACATCAATTGATGAA<br>GAGGATGCAGAGGCAGGCTTATTACTGCACTTCCTATTTACCTCAAAAAGACCAGAAAGAGAAGGAT<br>GCTGCTAAGTTAGTAGCAGATCTTGGTAGCATACAAGCGGACATTGTGGAGGCTGAGAAAAGACAC<br>TCATCAAGGGTCAAGACTCTTTCTAATGCCAGAGATTTGTTGACCAACTCCATTGAAAATCCAGATA<br>TAAGTCTTCACAGAGGACTAATACATGAAAAGAATGTGTCTCAGGTGTCCATATCAAGTACACAGA<br>ATGATAGGTTGATGATTAATATTGACCAACTAAAAAATGCATACTTTTCTATGAGATCTGAGATTGAG<br>CTCTCTGAAAGTAATGTTCCAGTACGTTTCAGATATAGATGTTCTAAAGATCCGTGATAGAACTTTCA<br>AGTCCGAAGTGATACCAATTCATTGAAGGAATCAACTGATCGTTTAGGTACCTTCTTTGAAGGTTTG<br>TGCAAGTATGCTCGATATAGTAGATTGGAAGTATGCAGCACCTAAGGAATGTGGATATCCTCAACTC<br>GTCAAATGTCAATTTGCTCTTTGAGTTTTGACCGGGATGAAGACTACTTTGCTGCTGCAGGAGTTTCA<br>AAGAAGATACAAATCTTTGAATACAGTTCTCTTTTGAATGACAGTGTGATATTCATTATCCATTGAT<br>TGAGATGTCAAATAGATCCATGCTCAGTTGTGTCTGCTGGAATAATTACATCAAGAAGTATTTAGCTT<br>CAACTGATTATGAAGGTGTGGTTCAGTTATGGGATGCAAGCACCGGTCAAGGATTCACAAAGTACA<br>CAGAACATCAAAAGAGAGCTTGGTCCGTCGATTTTTCTCAGACGGATCCAATGAAGTTGGCTAGTG<br>GAAGTGATGATTGTTCTGTGAAACTTTGGAGCATTAACGAGAATAGCTGTGTTGGTACAATCAGAA<br>GTATGGCCAACATATGTTGCGTGAAATTCCTCTGTAATCCCATTTCTTGGCCTTTGGCTCTTCTGAC<br>TACAAAATATACTGTTATGATCTACGGATTACTAGAATCCCTTGGTGCATTTGTCTGGACATGGAAA<br>GGCTGTGACGTATGTGAAATTCATAGACCCTGAAACACTTGTTTCTGCATCAACTGACAACACACTC<br>AAGCTATGGGATCTTAACAAGACAACTCAGGTGGATTGTCCACTGATGCCTGCAGCTTGACCTTC<br>AGCGGTCATACAAACGAGAAGAATTCGTGGGTTTATCTGTTTCTGATGGATACATAGCATGCGGTT<br>CAGAAACCAATGAAGTTTATACTTATTATAAACTTTACCCATGCCAATCACTACTTACAAATTTGGT<br>TCCGCTGATCCAATTACTGGAAGAGATGGGCAACGACAACAGACAATCTGTTTCAAGTGATGC<br>TGGAGAACCAAGTCAAACACTCTTGTGCGGGGACCTCCAATGGGAGCATGAAACTGCTGAAGTT<br>GGTCTAG |

**Table S3.** Specific primer sequences used for gene clone, vector construction and quantitative real-time PCR.

| Primer name        | Sequence                             | Purpose                    |
|--------------------|--------------------------------------|----------------------------|
| LoCOP1-F           | ATGGCGGACGCCTCCGTC                   | <i>LoCOP1</i> gene clone   |
| LoCOP1-R           | TCAGGCAGCAAGCACAAGG<br>AC            |                            |
| GFP-LoCOP1-F       | GGACTAGTATGGCGGACGCC<br>TCCGTC       | Subcellular localization   |
| GFP-LoCOP1-F       | CGAGCTCGGGGCAGCAAGC<br>ACAAG         |                            |
| pGADT7-LoCOP1-F    | TCCCCCGGGTATGGCGGACG<br>CCTC         | Y2H                        |
| pGADT7LoCOP1-R     | CCCTCGAGCGGCAGCAAGC<br>ACAAGGAC      |                            |
| VIGS-LoCOP1-F      | AAGGAAGTTTAACGTAGCTC<br>ATATGGCGGGAC | VIGS                       |
| VIGS-LoCOP1-R      | AACCACCACCACCGTCTCAA<br>GACCTGCATGAT |                            |
| pOx-LoCOP1-F       | GGGGTACCATGGCGGACGCC<br>TC           | Overexpression             |
| pOx-LoCOP1-R       | GGACTAGTAAGGCAGCAAGC<br>ACAAGGAC     |                            |
| pUC-SPYCE-LoCOP1-F | GGACTAGTATGGCGGACGCC<br>TCCGTC       | BIFC                       |
| pUC-SPYCE-LoCOP1-R | GACGTCGACGGCAGCAAGC<br>ACAAG         |                            |
| qPCR-LoCOP1-F      | GTCCCCAATGTTCGTAGCTC                 | quantitative real-time PCR |
| qPCR-LoCOP1-R      | GCTGCCCTGGATAGCTTCC                  |                            |
| GAPDH-F            | GGTATTGTCGAGGGTTTGAT<br>G            |                            |
| GAPDH-R            | AGGGAGAACTTTGCCAACA<br>GC            |                            |

**Table S4.** Gene IDs of *COP1* genes used for multiple sequence alignment and phylogenetic analysis.

| Name   | Species                                | Gene ID        |
|--------|----------------------------------------|----------------|
| OsCOP1 | <i>Oryza sativa Japonica Group</i>     | BAA94422.1     |
| ObCOP1 | <i>Oryza brachyantha</i>               | XP_006647974.2 |
| BdCOP1 | <i>Brachypodium distachyon</i>         | XP_010236060.1 |
| TuCOP1 | <i>Triticum urartu</i>                 | EMS63367.1     |
| ZmCOP1 | <i>Zea mays</i>                        | NP_001152482.1 |
| SiCOP1 | <i>Setaria italica</i>                 | XP_004954056.1 |
| AcCOP1 | <i>Ananas comosus</i>                  | OAY85246.1     |
| CnCOP1 | <i>Cocos nucifera</i>                  | KAG1327072.1   |
| EgCOP1 | <i>Elaeis guineensis</i>               | XP_010913400.1 |
| AsCOP1 | <i>Apostasia shenzhenica</i>           | PKA52651.1     |
| PeCOP1 | <i>Phalaenopsis equestris</i>          | XP_020577071.1 |
| DcCOP1 | <i>Dendrobium catenatum</i>            | XP_028554358.1 |
| VvCOP1 | <i>Vitis vinifera</i>                  | XP_002270330.2 |
| SlCOP1 | <i>Solanum lycopersicum</i>            | NP_001234047.2 |
| InCOP1 | <i>Ipomoea nil</i>                     | AAG31173.1     |
| GmCOP1 | <i>Glycine max</i>                     | XP_003545597.1 |
| GsCOP1 | <i>Glycine soja</i>                    | KHN44754.1     |
| CaCOP1 | <i>Cicer arietinum</i>                 | XP_004491092.1 |
| RcCOP1 | <i>Ricinus communis</i>                | XP_002534127.1 |
| PtCOP1 | <i>Populus trichocarpa</i>             | XP_002321154.1 |
| GrCOP1 | <i>Gossypium raimondii</i>             | KJB42844.1     |
| BnCOP1 | <i>Brassica napus</i>                  | NP_001302788.1 |
| BoCOP1 | <i>Brassica oleracea var. oleracea</i> | XP_013637215.1 |
| AtCOP1 | <i>Arabidopsis thaliana</i>            | AT2G32950.1    |

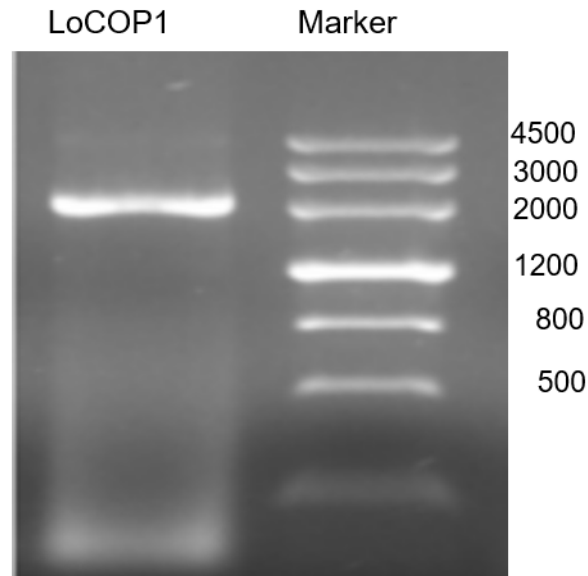

**Figure S1.** Electropherogram of a LoCOP1 clone

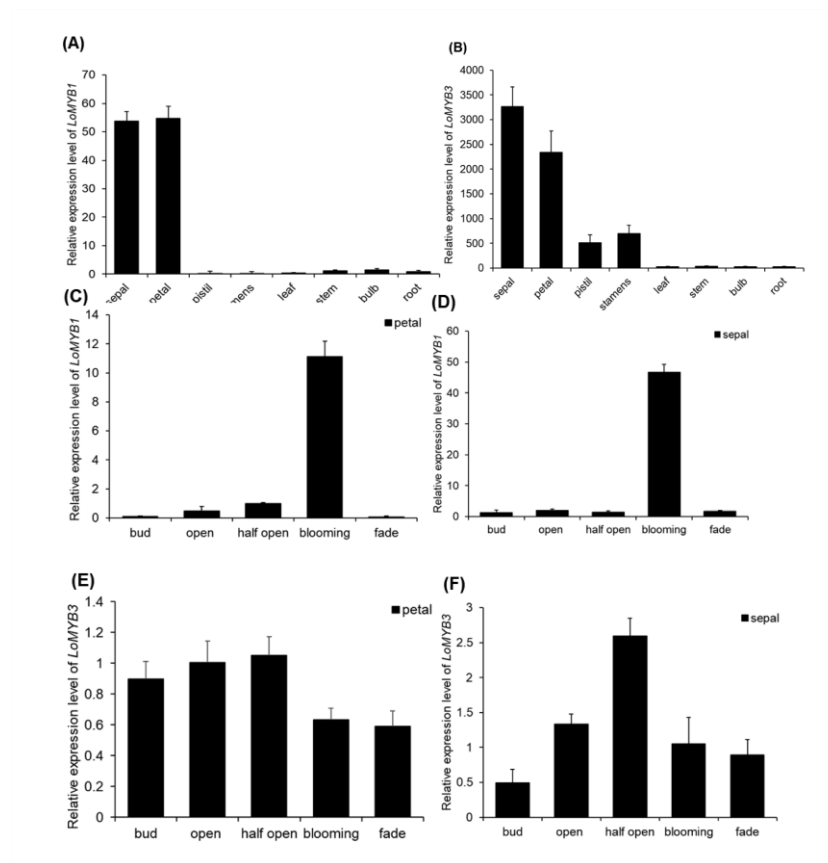

**Figure S2.** RT-qPCR analysis showing tissue-specific and development-regulated expression of LoMYB1 and LoMYB3. (A) Transcript levels of LoMYB1 in various tissues of Lilium 'Siberia'. (B) Transcript levels of LoMYB3 in various tissues of Lilium 'Siberia'. (C) LoMYB1 transcript

levels in the different development stages of petal. (D) LoMYB1 transcript levels in the different development stages of sepal. (E) LoMYB3 transcript levels in the different development stages of petal. (F) LoMYB3 transcript levels in the different development stages of sepal. Error bars show the standard deviations from three biological replicates.

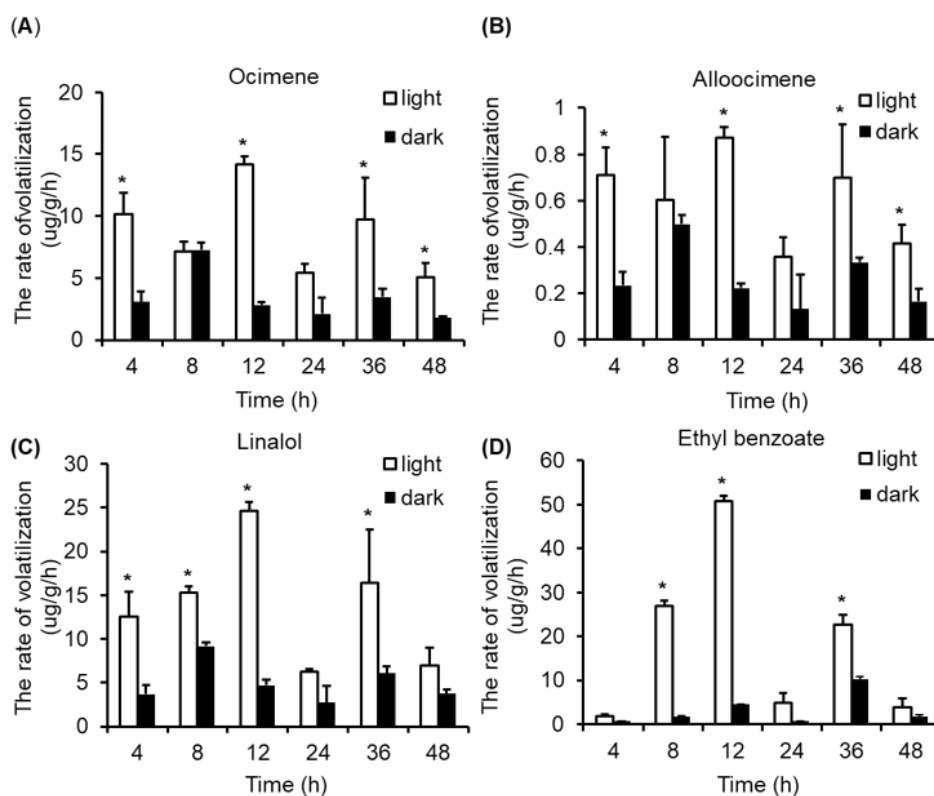

**Figure S3.** The rate of volatilization of the main floral fragrance components under continuous light and dark treatment. (A) The rate of volatilization of Ocimene. (B) The rate of volatilization of Alloocimene (C) The rate of volatilization of Linalol (D) The rate of volatilization of Ethyl benzoate. Asterisks indicate statistically differences ( $*p < 0.05$ ). Error bars show the standard deviations from three biological replicates.

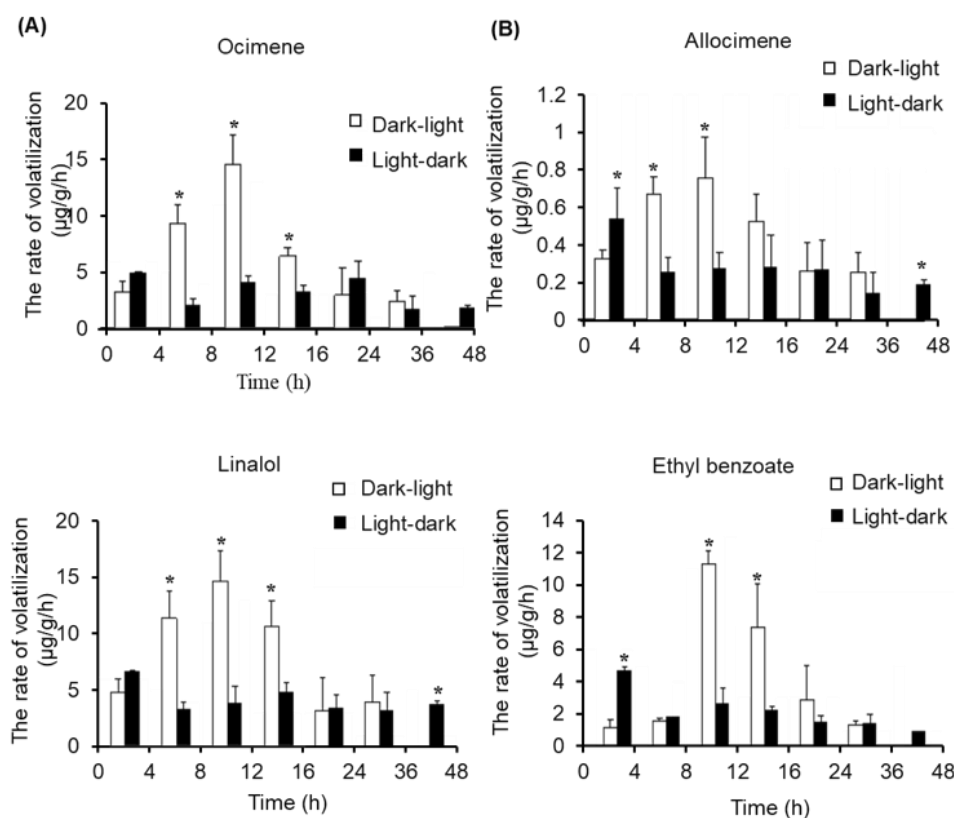

**Figure S4.** The rate of volatilization of the main floral fragrance components under light and dark transition. (A) The rate of volatilization of Ocimene at different time point after light and dark transition. (B) The rate of volatilization of Alloocimene at different time point after light and dark transition. (C) The rate of volatilization of Linalol at different time point after light and dark transition. (D) The rate of volatilization of Ethyl benzoate at different time point after light and dark transition. Asterisks indicate statistically differences (\* $p < 0.05$ ). Error bars show the standard deviations from three biological replicates.

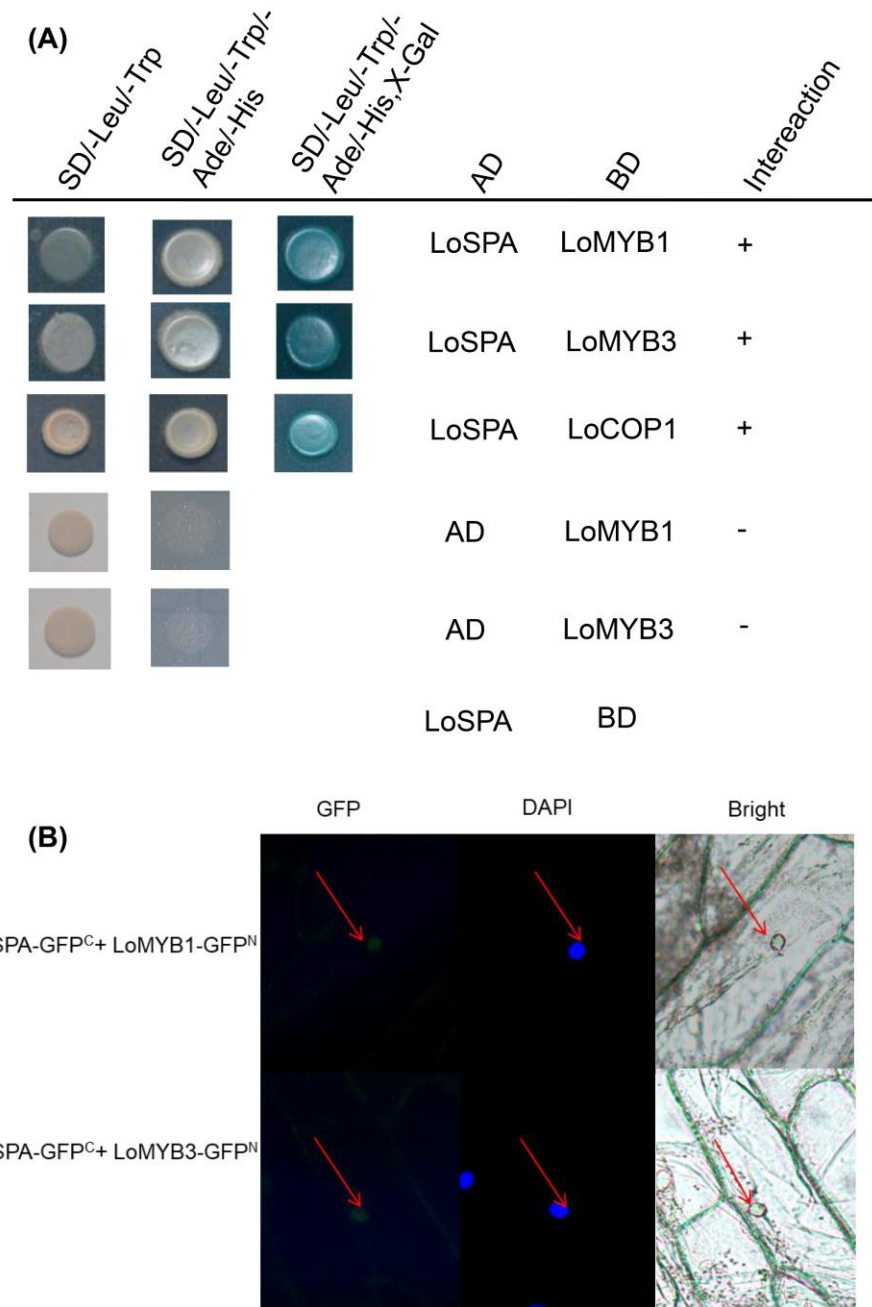

**Figure S5.** Interaction between LoSPA with LoCOP1, LoMYB1 and LoMYB3. (A) Yeast two-hybrid assays were conducted with selective growth combined with a 5-bromo-4-chloro-3-indolyl-b-d-galactopyranoside acid overlay assay. (B) BiFC interaction assays using onion epidermal cells. GFP fluorescence was detected at 2 d after transfection.



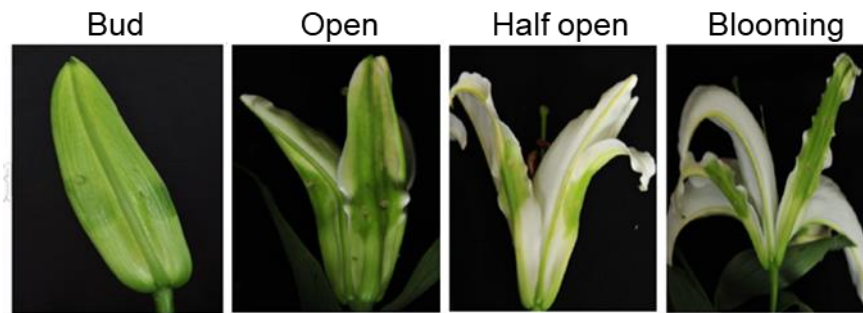

**Figure S6.** Growth and development condition of *Lilium* 'Siberia' flower after infecting by BMVS virus.
